# Supplementary material for: USP7 Inhibits Osteoclastogenesis via Dual Effects of Attenuating TRAF6/TAK1 Axis and Stimulating STING Signaling
Source: PubMed Central journal article supplement (PMC10676781; doi:10.14336/ad.2023.0325-1), 2023-12-01
Supplement: AD-14-6-2267-s.pdf [file AD-14-6-2267-s.pdf]

# **USP7 Inhibits Osteoclastogenesis *via* Dual Effects of Attenuating TRAF6/TAK1 Axis and Stimulating STING Signaling**

**Ziang Xie<sup>1,2#,\*</sup>, Yizheng Wu<sup>1,2#</sup>, Yang Shen<sup>1,2#</sup>, Jiandong Guo<sup>3</sup>, Putao Yuan<sup>1,2</sup>, Qingliang Ma<sup>1,2</sup>, Shiyu Wang<sup>1,2</sup>, Zhiwei Jie<sup>1,2</sup>, Hongyi Zhou<sup>1,2</sup>, Shunwu Fan<sup>1,2,\*</sup>, Shuai Chen<sup>1,2\*</sup>**

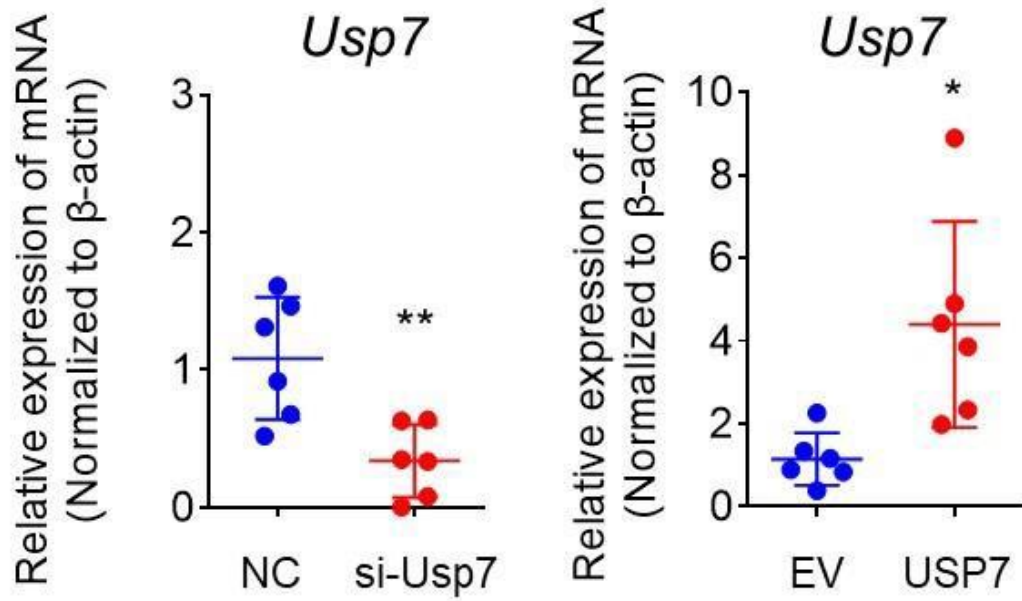

**Supplemental Figure 1. The efficiency of silencing USP7 and overexpression of USP7.** The effect of Usp7 sirRNA or overexpression plasmid of USP7 on BMMs was analyzed by qPCR assay. Data are presented as the mean  $\pm$  S.D. \*,  $P < 0.05$ . \*\*,  $P < 0.01$ .

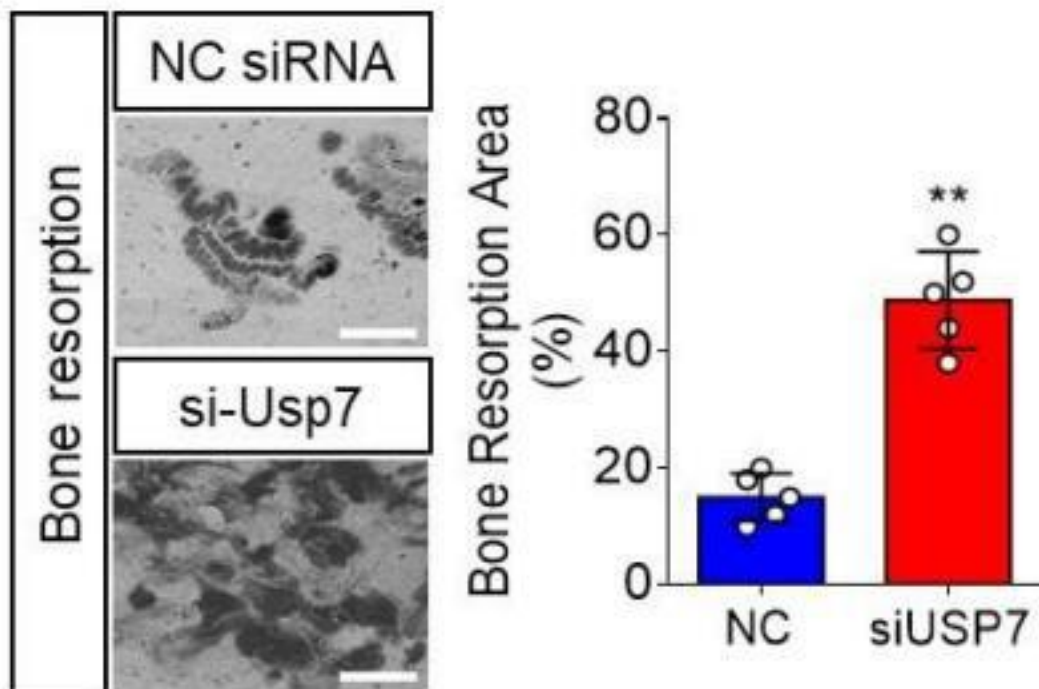

**Supplemental Figure 2. The effects of Usp7 siRNA on bone resorption.** The effects of NC siRNA or Usp7 siRNA on bone resorption was analyzed by bone slices assay. Scale bar=100  $\mu$ m. Data are presented as the mean  $\pm$  S.D. \*\*,  $P < 0.01$ .

**A P5091 cck8 assay**

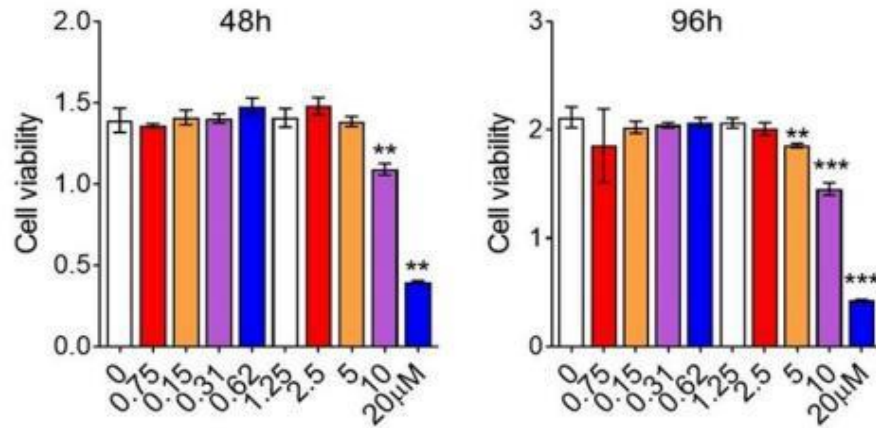

**B DMXA cck8 assay**

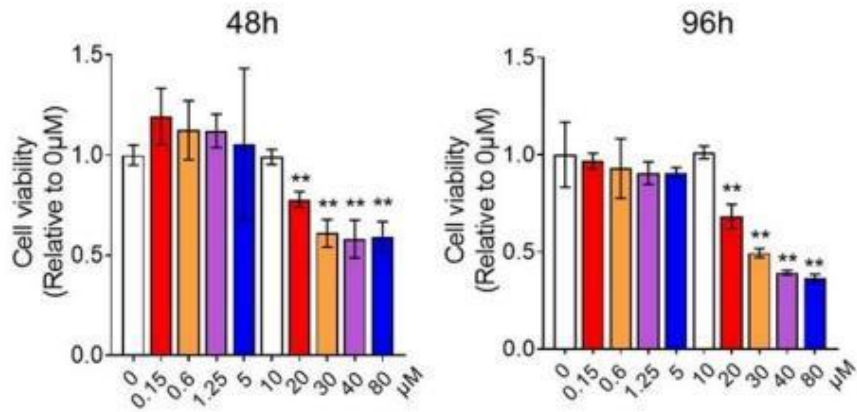

**Supplemental Figure 3. Cell viability of P5091 on BMMs.** (A) The effect of P5091 on BMMs was analyzed by CCK8 assay for treatment with 48h or 96h. Data are presented as the mean  $\pm$  S.D. \*,  $P < 0.05$ . \*\*,  $P < 0.01$ .

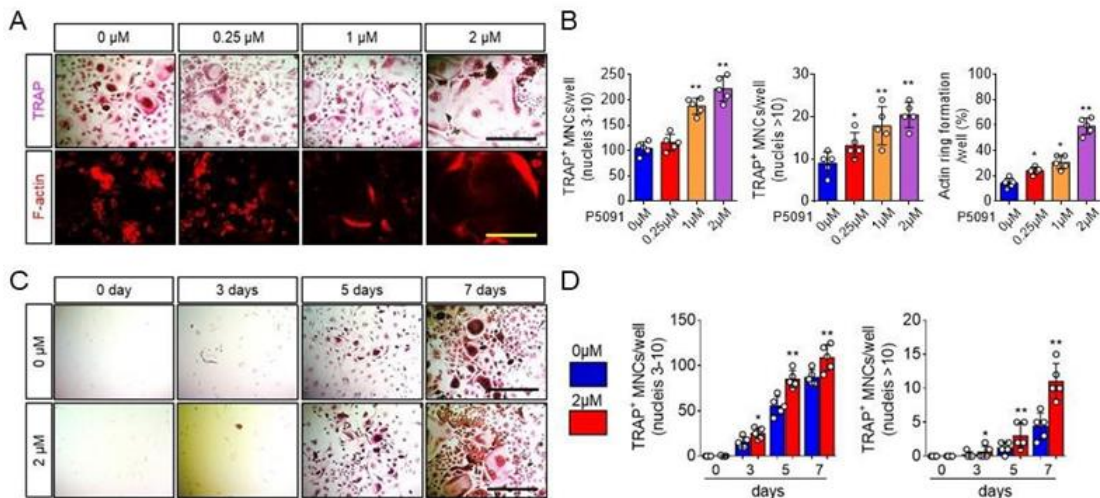

**Supplemental Figure 4. The effects of P5091 on osteoclast formation in dose- dependent manner.** (A) The effect of different concentrations of P5091 on BMMs was analyzed by TRAP and F-actin assay for treatment 5 days. (B) Quantitative analysis of osteoclast number. (C) The effect of different days of P5091 on BMMs was analyzed by TRAP and F-actin assay for treatment with 2µM. (D) Quantitative analysis of osteoclast number. Data are presented as the mean  $\pm$  S.D. \*,  $P < 0.05$ . \*\*,  $P < 0.01$ .

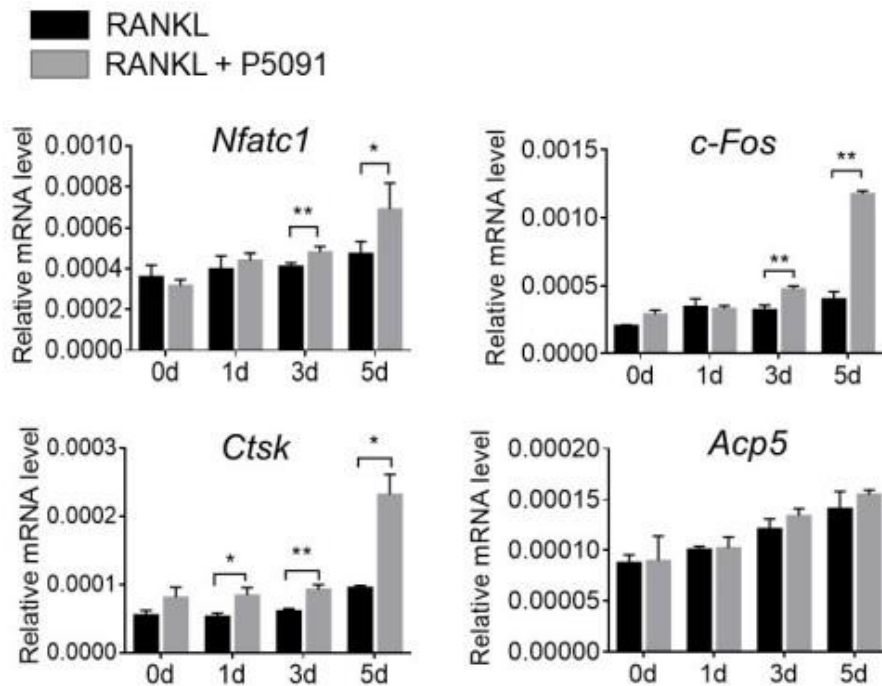

**Supplemental Figure 5. The effects of P5091 on osteoclast related genes expression.** In stimulation with RANKL, the expression of *Nfatc1*, *c-fos*, *Ctsk* and *Atp0d2* in RAW264.7 cells were analyzed by qPCR assay in treatment with P5091 (2  $\mu$ M) or not. Data are presented as the mean  $\pm$  S.D. \*,  $P < 0.05$ . \*\*,  $P < 0.01$ .

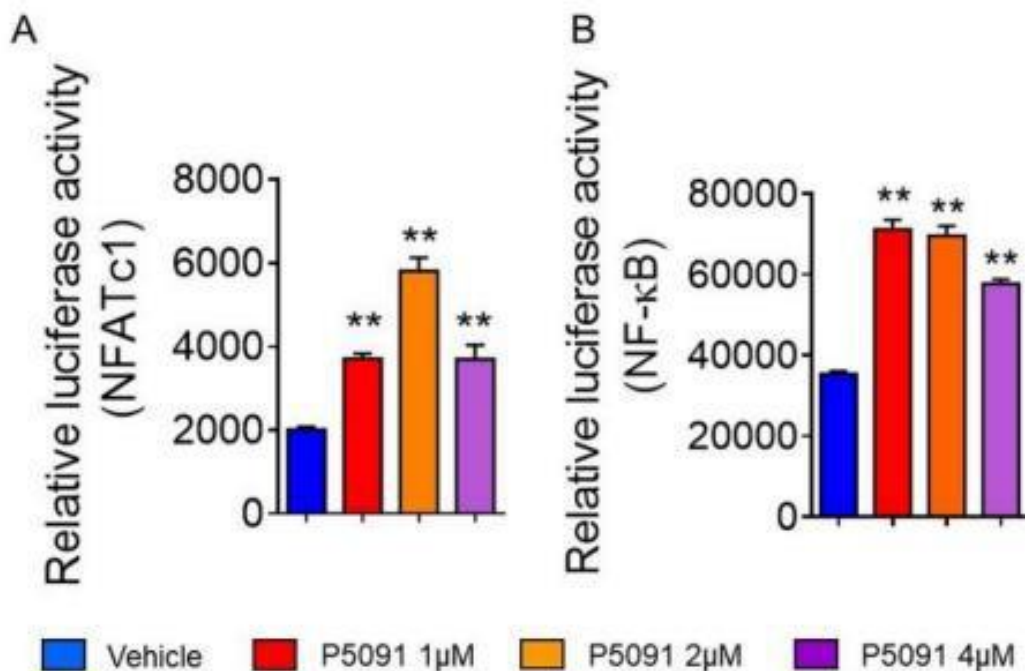

**Supplemental Figure 6. The effects of P5091 on transcription activity of *Nfatc1* and NF- $\kappa$ B.** (A) In the presence of M-CSF and RANKL, the BMMs were treated with different concentrations of P5091, the transcription activity of *Nfatc1* was tested by dual luciferase reporter genes system. Data are presented as the mean  $\pm$  S.D. \*\*,  $P < 0.01$ . (B) In the presence of M-CSF and RANKL, the BMMs were treated with different concentrations of P5091, the transcription activity of NF- $\kappa$ B was tested by dual luciferase reporter genes system. Data are presented as the mean  $\pm$  S.D. \*\*,  $P < 0.01$ .

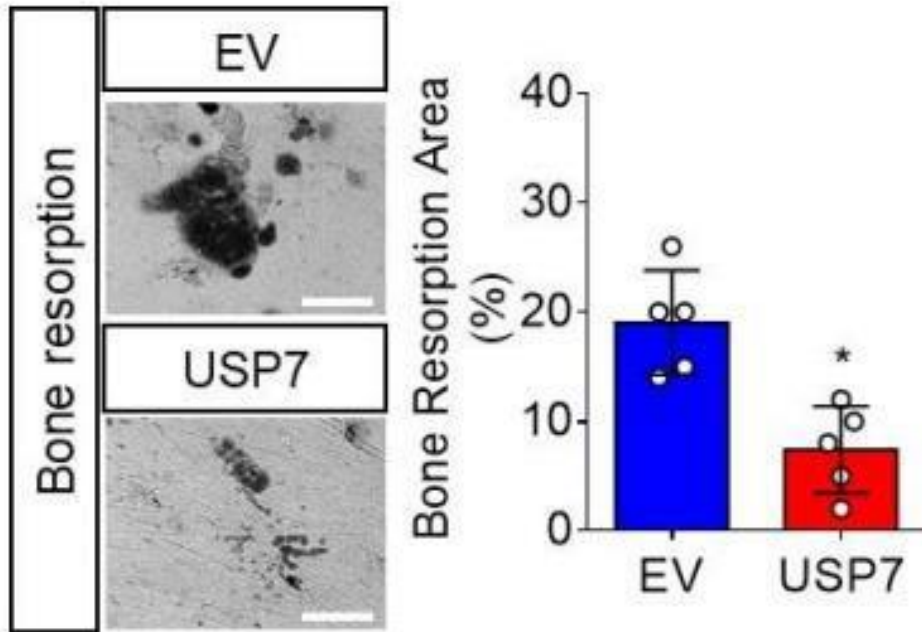

**Supplemental Figure 7. The effects of Usp7 overexpress-plasmid on bone resorption.** The effects of empty vector or Usp7 plasmid on bone resorption was analyzed by bone slices assay. Scale bar=100  $\mu$ m. Data are presented as the mean  $\pm$  S.D. \*,  $P < 0.05$ .

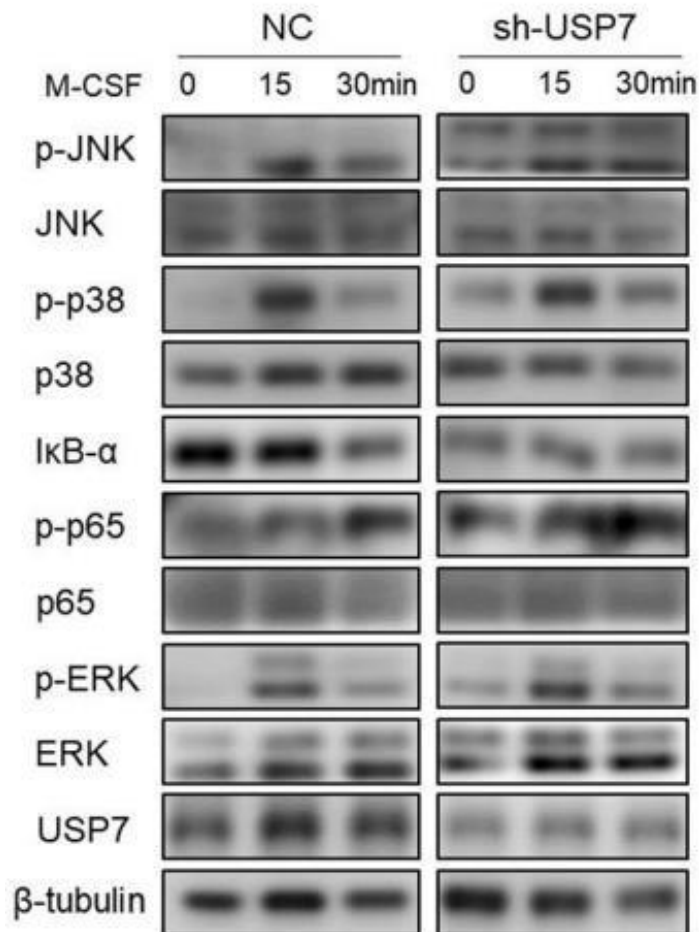

**Supplemental Figure 8. The effects of sh-USP7 on MAPKs and NF- $\kappa$ B signaling pathways in stimulation with M-CSF.** In stimulation with M-CSF at different time points,

the activation alteration of MAPKs and NF- $\kappa$ B signaling pathways by treatment with sh-USP7

**Supplementary Table 1. The detailed information for antibodies.**

| Regent                     | Source                                 | Dilution            |
|----------------------------|----------------------------------------|---------------------|
| Anti-GAPDH                 | Abcam                                  | WB 1:2500           |
| Anti- $\beta$ -actin       | Abcam                                  | WB 1:2500           |
| Anti-USP7                  | Cell Signaling Technology, ProteinTech | WB 1:1000           |
| Anti-NFATc1                | Cell Signaling Technology              | WB 1:1000           |
| Anti-c-Fos                 | Cell Signaling Technology              | WB 1:1000           |
| Anti-CTSK                  | Santacruz, Abcam                       | WB 1:500, IF 1:200  |
| Anti-TRAP                  | GeneTex, Abcam                         | WB 1:1000           |
| Anti-TRAF6                 | Santacruz, Abcam                       | WB 1:1000, IF 1:200 |
| Anti-Ub                    | Cell Signaling Technology              | WB 1:1000           |
| Anti-Ub(K63)               | Cell Signaling Technology              | WB 1:1000           |
| Anti-Ub(K48)               | Cell Signaling Technology              | WB 1:1000           |
| Anti-HA                    | Abcam                                  | WB 1:5000           |
| Anti-Flag                  | Abcam                                  | WB 1:5000           |
| Anti-Myc                   | Abcam                                  | WB 1:5000           |
| Anti-I $\kappa$ B $\alpha$ | Cell Signaling Technology              | WB 1:1000           |
| Anti-Phospho- TAK1         | Cell Signaling Technology              | WB 1:1000           |
| Anti-TAK1                  | Cell Signaling Technology              | WB 1:1000           |
| Anti-Phosphor-p38          | Cell Signaling Technology              | WB 1:1000           |
| Anti-Phospho-JNK           | Cell Signaling Technology              | WB 1:1000           |
| Anti-Phospho-ERK           | Cell Signaling Technology              | WB 1:1000           |
| Anti-Total-p38             | Cell Signaling Technology              | WB 1:1000           |
| Anti-Total-JNK             | Cell Signaling Technology              | WB 1:1000           |
| Anti-Total-ERK             | Cell Signaling Technology              | WB 1:1000           |

# SUPPLEMENTARY DATA

Supplementary table 2. Primers for quantitative RT-PCR.

| Genes         | Upstream (5'-3')          | Downstream (5'-3')       |
|---------------|---------------------------|--------------------------|
| <i>Gapdh</i>  | ACCCAGAAGACTGTGGATGG      | CACATTGGGGGTAGGAACAC     |
| <i>Ctsk</i>   | CTTCCAATACGTGCAGCAGA      | TCTTCAGGGCTTTCTCGTTC     |
| <i>Acp5</i>   | CTGGAGTGCACGATGCCAGCGAC A | TCCGTGCTCGGCGATGGACCAG A |
| <i>c-Fos</i>  | CCAGTCAAGAGCATCAGCAA      | AAGTAGTGCAGCCCGGAGTA     |
| <i>Nfatc1</i> | CCGTTGCTTCCAAAAATAACA     | TGTGGGATGTGAACTCGGAA     |
| <i>Usp7</i>   | GGTGAATTCCTGGAGTCTGT      | AGTCTCATTGTCTTGCCTGTT    |

Supplementary Table 3. siRNA sequences used in our study.

| Alias            | sense (5'-3')          | antisense (5'-3')      |
|------------------|------------------------|------------------------|
| <i>si-Usp7#1</i> | GAGGCAACCUUUCAGUUCAT T | UGAACUGAAAGGUUGCCUCTT  |
| <i>si-Usp7#2</i> | GCGUCCCUUAGCAUUCAT T   | UGUAAUGC UAAAGGGACGCTT |
| <i>si-Usp7#3</i> | GCCCAAGUUUGAUAAAGAUT T | AUCUUUAUCAACUUGGGCTT   |
